# Supplementary material
Source: publisher figshare collection journal article supplement (https://acs.figshare.com/ndownloader/files/4483657)
Supplement: Supplementary file 1 [file 4483657]

Submitted to *J. Phys. Chem. C*

**Effect of size on the electrochemical stability of Pt nanoparticles deposited  
on gold substrate**

S. Garbarino, A. Pereira <sup>§</sup>, C. Hamel, É. Irissou, M. Chaker and D. Guay <sup>\*</sup>

INRS-Énergie, Matériaux et Télécommunications,  
1650 Blvd. Lionel-Boulet, C.P. 1020,  
Varenes, Québec Canada J3X 1S2

SUPPLEMENTARY MATERIALS

REVISED VERSION of jp-2009-08724k

File: Pt\_dissolution\_Supp\_Mater  
Prepared: 15/01/2010

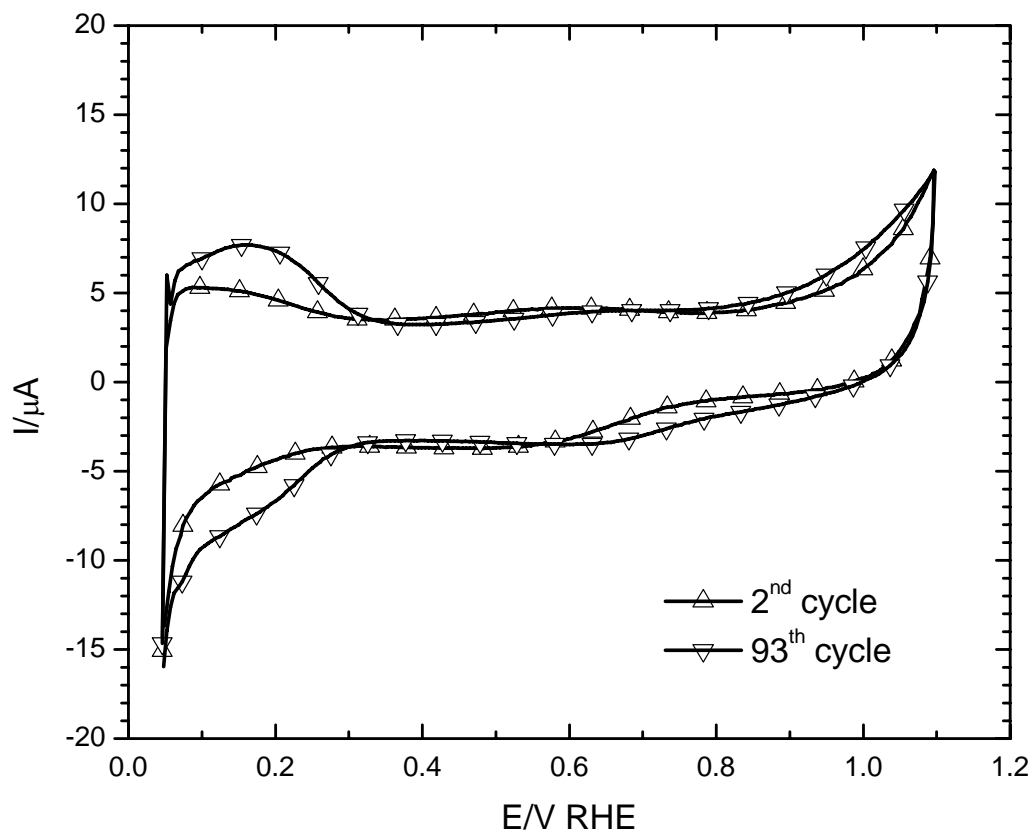

Fig. S1      Cyclic voltammograms of isolated Pt nanoparticles recorded in 0.5 M  $\text{H}_2\text{SO}_4$  at room temperature. The initial diameter of the nanoparticle is 1.8 nm. The 2<sup>nd</sup> and the 93<sup>th</sup> cycle are shown.

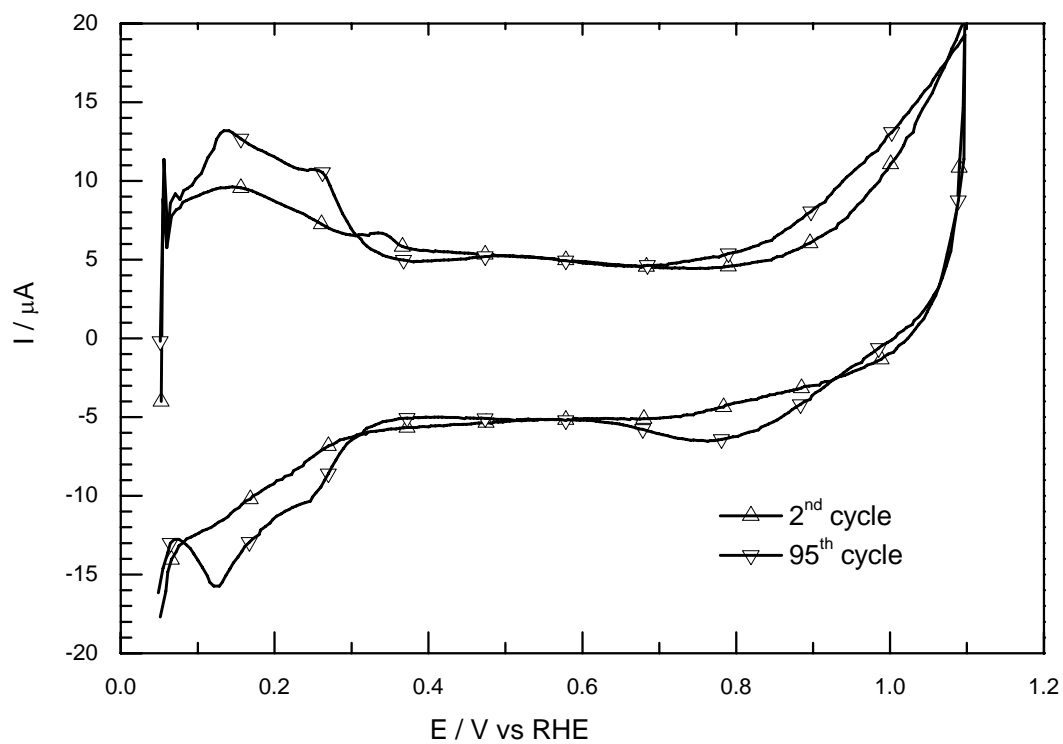

Fig. S2      Cyclic voltammograms of isolated Pt nanoparticles recorded in 0.5 M  $\text{H}_2\text{SO}_4$  at room temperature. The initial diameter of the nanoparticle is 3.0 nm. The 2<sup>nd</sup> and the 95<sup>th</sup> cycle are shown.
